# Supplementary material
Source: PubMed Central journal article supplement (PMC11419309)
Supplement: NIHMS1882617-supplement-Checklist.pdf [file NIHMS1882617-supplement-Checklist.pdf]

## Major Resources Table

### Animals (in vivo studies)

| Species | Vendor or Source | Background Strain | Sex             | Persistent ID / URL                                                                                 |
|---------|------------------|-------------------|-----------------|-----------------------------------------------------------------------------------------------------|
| Mouse   | Jax Labs         | C57Bl6/J          | Male            | <a href="https://www.jax.org/strain/000664?featured">https://www.jax.org/strain/000664?featured</a> |
| Mouse   | Jax Labs         | C57Bl6/J          | Female          | <a href="https://www.jax.org/strain/000664?featured">https://www.jax.org/strain/000664?featured</a> |
| Mouse   | Envigo           | ICR-Cd1           | Male and female | <a href="https://www.envigo.com/model/hsd-icr-cd-1">https://www.envigo.com/model/hsd-icr-cd-1</a>   |

### Genetically Modified Animals

|                        | Species | Vendor or Source | Background Strain | Other Information | Persistent ID / URL                                                               |
|------------------------|---------|------------------|-------------------|-------------------|-----------------------------------------------------------------------------------|
| <b>Parent - Male</b>   | Mouse   | Jax              | C57Bl6/J          | <i>Mpl KO</i>     | <a href="https://www.jax.org/strain/005124">https://www.jax.org/strain/005124</a> |
| <b>Parent - Female</b> | Mouse   | Jax              | C57Bl6/J          | <i>Mpl KO</i>     | <a href="https://www.jax.org/strain/005124">https://www.jax.org/strain/005124</a> |

### Antibodies

| Target antigen                                 | Vendor or Source      | Catalog #     | Working concentration |
|------------------------------------------------|-----------------------|---------------|-----------------------|
| LY6C                                           | BioLegend             | 128026        | 1 µg/ml               |
| CD11B                                          | BioLegend             | 101212        | 1 µg/ml               |
| CD41                                           | BioLegend             | 133915        | 1 µg/ml               |
| CCR2                                           | BioLegend             | 150610        | 1 µg/ml               |
| CCR5                                           | BioLegend             | 107016        | 1 µg/ml               |
| CD45                                           | BioLegend             | 103108        | 1 µg/ml               |
| LY6G                                           | BioLegend             | 127612        | 1 µg/ml               |
| P-selectin                                     | Fisher Scientific     | BDB553744     | 1 µg/ml               |
| Prostaglandin I2                               | Cayman Chemical       | 18220         | 5nM/ml                |
| Anti-mouse PSGL-1                              | BioXcell              | BE0186        | 20mg/kg               |
| Anti-mouse CD18                                | BioXcell              | BE0009        | 40 µg/ml              |
| IgG                                            | BioXcell              | BP0091        | 10mg/kg               |
| Mouse CCL2/JE/MCP-1 DuoSet ELISA               | R&D system            | DY479-05      | As per instruction    |
| Mouse CXCL1/KC DuoSet ELISA                    | R&D system            | DY453-05      | As per instruction    |
| B2M ELISA Kit (Mouse)                          | Aviva Biosystem       | OKEH00344     | As per instruction    |
| Human beta 2-Microglobulin Parameter Assay Kit | R&D system            | KGE019        | As per instruction    |
| Recombinant Mouse CCL2/JE/MCP-1 Protein        | R&D system            | 479-JE-050/CF | 200 nM/ml             |
| Recombinant Mouse CCL5/RANTES Protein          | R&D system            | 478-MR-025/CF | 200 nM/ml             |
| Mouse Monocytes isolation kit                  | STEMCELL Technologies | 19861         | As per instruction    |
| Crystal Violet                                 | Fisher Scientific     | C581-25       | 1%                    |

### Primer

| Target gene | Vendor or Source | Catalog #     | Species |
|-------------|------------------|---------------|---------|
| <i>Ccl2</i> | Thermo Fisher    | Mm00441242_m1 | Mouse   |
| <i>Ccr2</i> | Thermo Fisher    | Mm99999051_gH | Mouse   |

|       |               |               |       |
|-------|---------------|---------------|-------|
| Ccr5  | Thermo Fisher | Mm01963251_s1 | Mouse |
| Gapdh | Thermo Fisher | Mm99999915_g1 | Mouse |

## ARRIVE GUIDELINES

### Study Design

| Groups              | Sex | Age      | Number (prior to experiment) | Number (after termination) | Littermates (Yes/No) | Other description                 |
|---------------------|-----|----------|------------------------------|----------------------------|----------------------|-----------------------------------|
| Group 1             | M/F | 8-10 wks | Not available                | Not available              | Yes                  | Adult platelet and monocyte donor |
| Group 2             | M/F | P7       | Not available                | Not available              | Yes                  | Neonatal platelet donor           |
| TPOR <sup>-/-</sup> | M/F | P14      | Not available                | Not available              | Yes                  | Transfusion recipient             |

**Sample Size:** Not available

**Inclusion Criteria:** Not applicable

**Exclusion Criteria:** Not applicable

**Randomization:** Not applicable – platelet donors and transfusion recipients must be of the appropriate age and must either be WT donors or TPOR<sup>-/-</sup> transfusion recipients. Whether transfusion recipients received adult or neonatal transfusions was random.

**Blinding:** Not applicable – platelet donors and transfusion recipients must be of the appropriate age and must either be WT donors or TPOR<sup>-/-</sup> transfusion recipients.
