# Supplementary material
Source: PubMed Central journal article supplement (PMC11419309)
Supplement: NIHMS1882617-supplement-Supplemental_Publication_Material.pdf [file NIHMS1882617-supplement-Supplemental_Publication_Material.pdf]

## **Supplemental Materials**

**Title:** Transfusion of Adult, but not Neonatal, Platelets Promotes Monocyte Trafficking in Neonatal Mice

**Authors:** Preeti Maurya<sup>1,2</sup>, Sara K. Ture<sup>1</sup>, Chen Li<sup>1</sup>, Kristin M. Scheible<sup>2</sup>, Kathleen E. McGrath<sup>2</sup>, James Palis<sup>2,5</sup>, Craig N. Morrell<sup>1,3,4,5</sup>

### **Affiliations**

1. Aab Cardiovascular Research Institute, University of Rochester School of Medicine and Dentistry, Rochester, NY
2. Department of Pediatrics, University of Rochester School of Medicine and Dentistry, Rochester, NY
3. Department of Medicine, University of Rochester School of Medicine and Dentistry, Rochester, NY
4. Department of Microbiology and Immunology, University of Rochester School of Medicine and Dentistry, Rochester, NY
5. Department of Pathology and Laboratory Medicine, University of Rochester School of Medicine and Dentistry, Rochester, NY

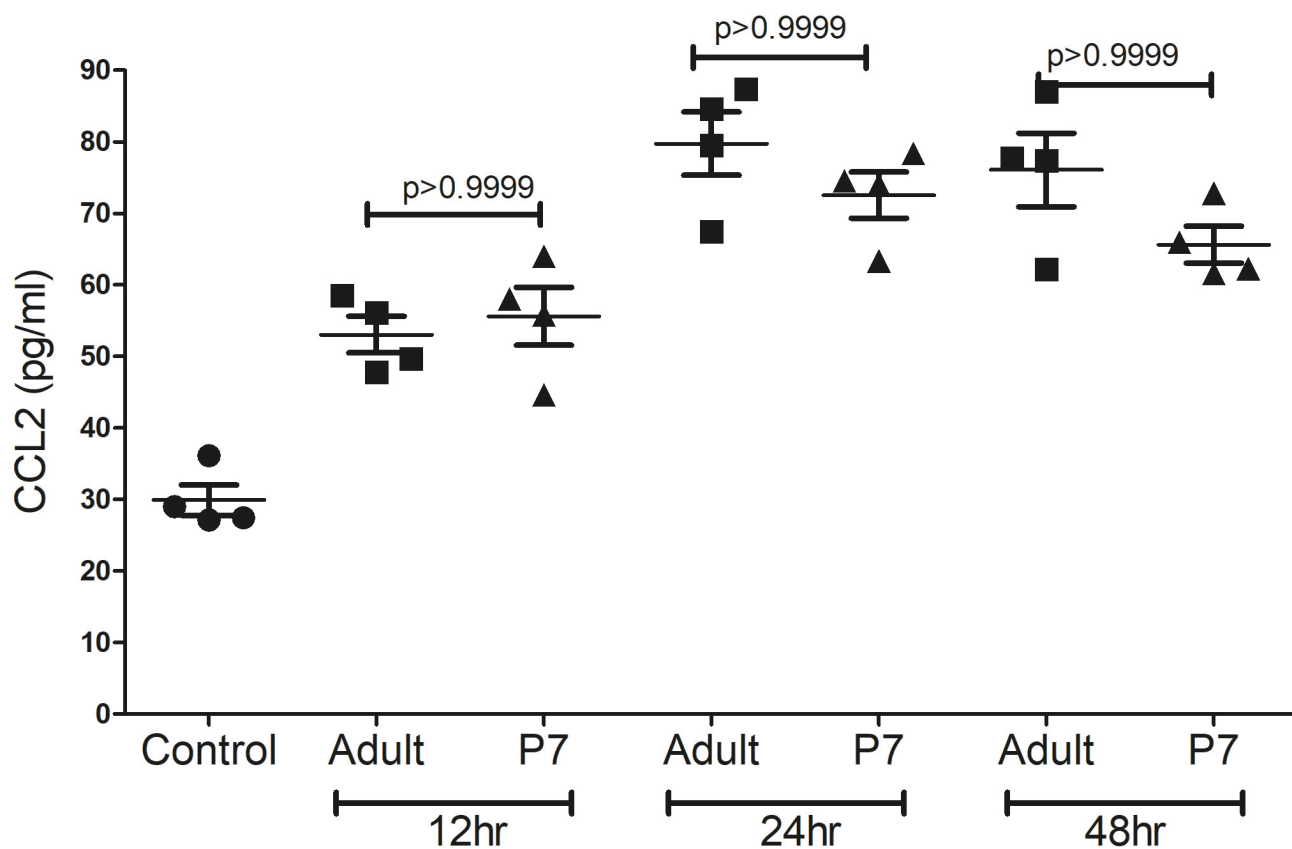

Figure S1: Adult or P7 platelets were co-incubated with monocytes and 12, 24 and 48 hr later culture supernatant was collected to measure CCL2 by ELISA. Both adult and P7 platelets induced CCL2 production *in vitro* over 48 hrs *in vitro* (mean  $\pm$  SEM , Kruskal Wallis with Dunn's multiple comparison).

## 2 hrs post-transfusion

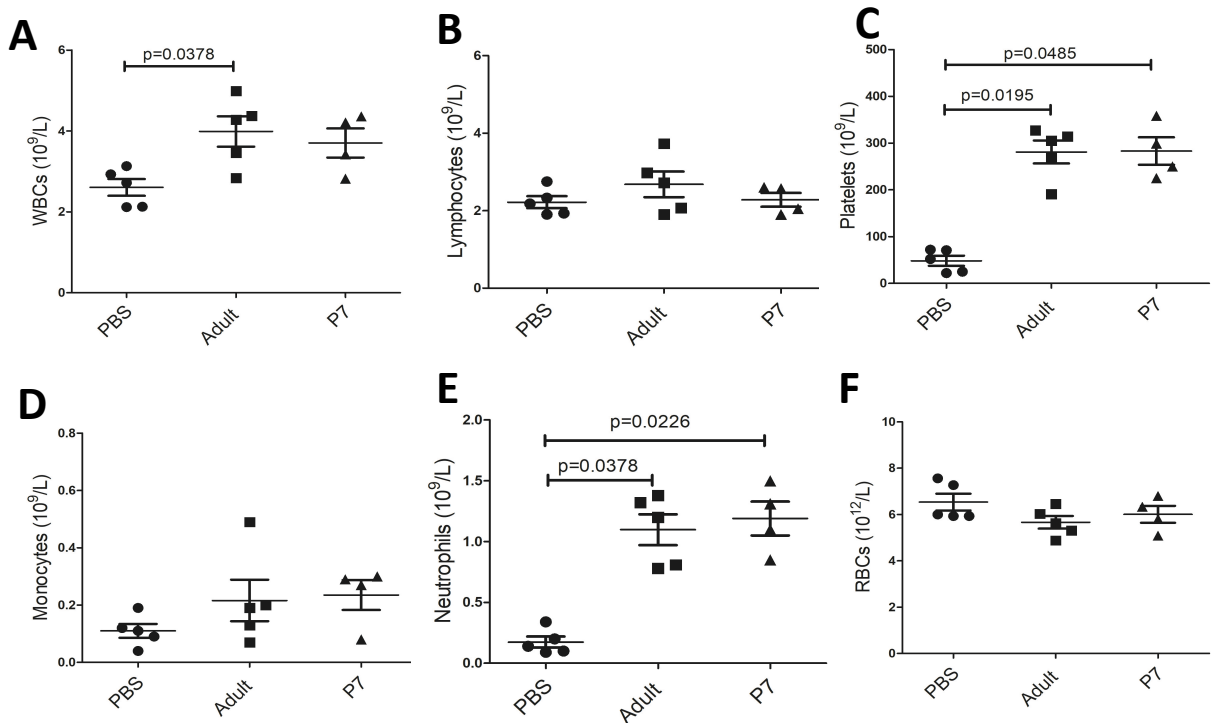

## 24 hrs post-transfusion

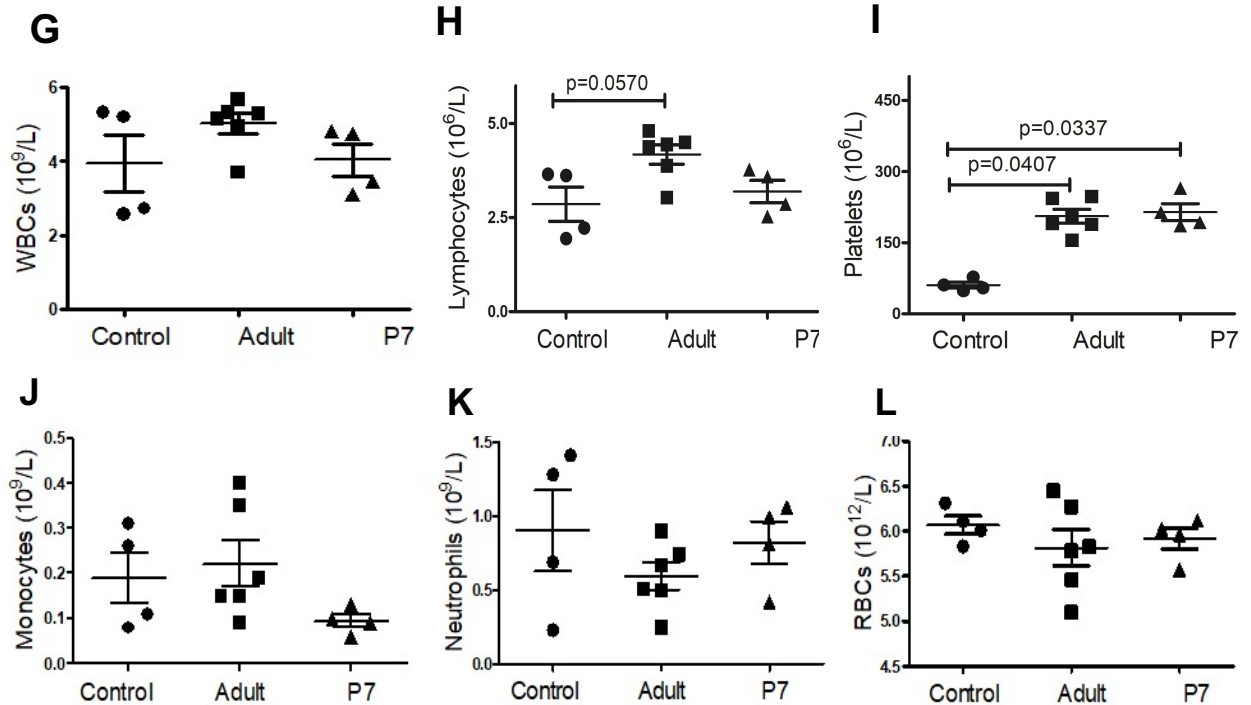

Figure S2: TPOR<sup>-/-</sup> mice were transfused with adult or P7 platelets and 2 or 24 hrs later CBC were performed. Adult and P7 platelets had similar post-transfusion CBC at both time points (mean ± SEM, Kruskal Wallis with Dunn's multiple comparison).

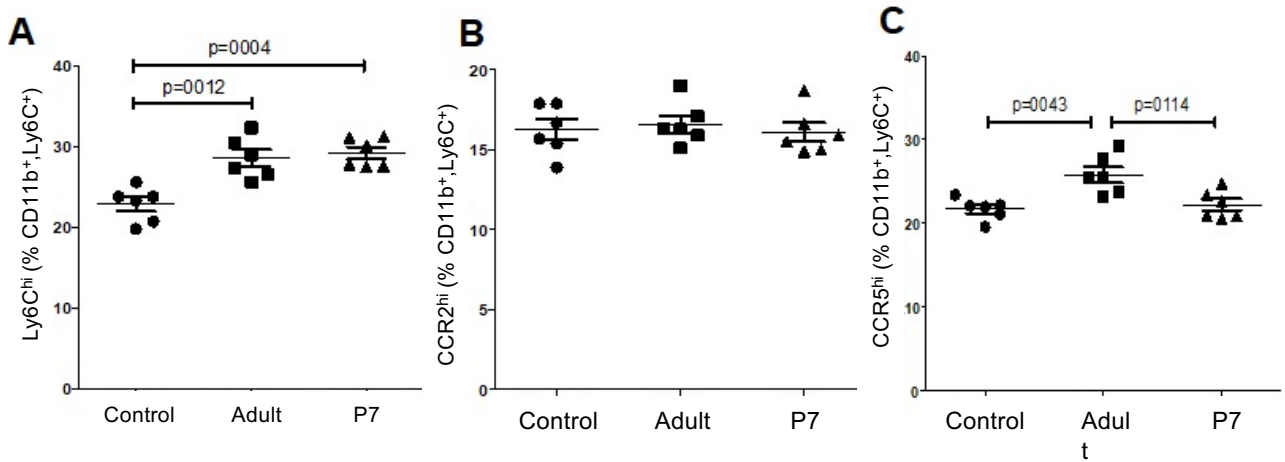

Figure S3: Platelet releasates did not increase trafficking monocyte phenotype *in vitro*. BMM were co-incubated with adult or P7 platelet releasates and 4 hrs later Ly6C, CCR2 and CCR5 expression were determined. A) Both adult and P7 releasates increased Ly6C but B) neither increased CCR2 and C) only adult increased CCR5 (mean  $\pm$  SEM 1-way ANOVA with Bonferroni correction).

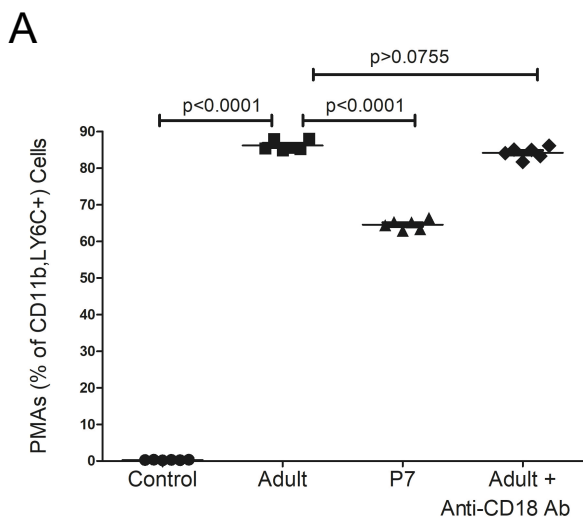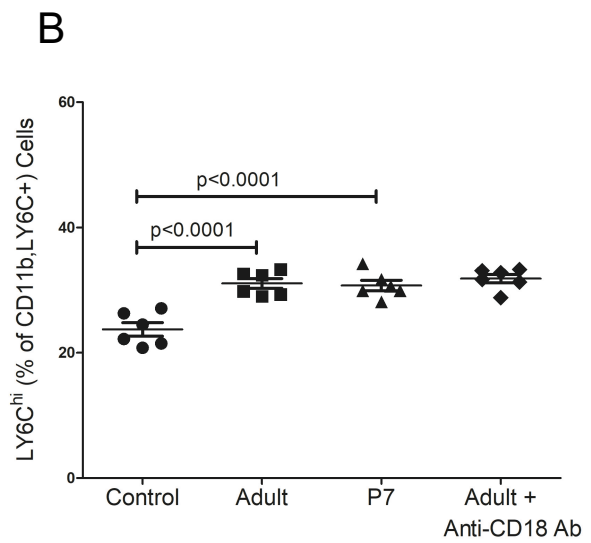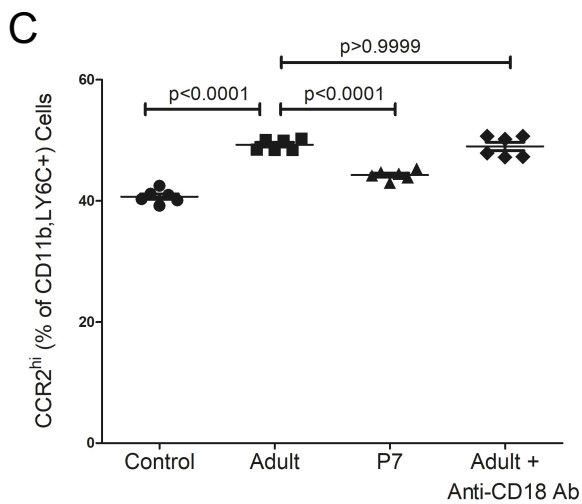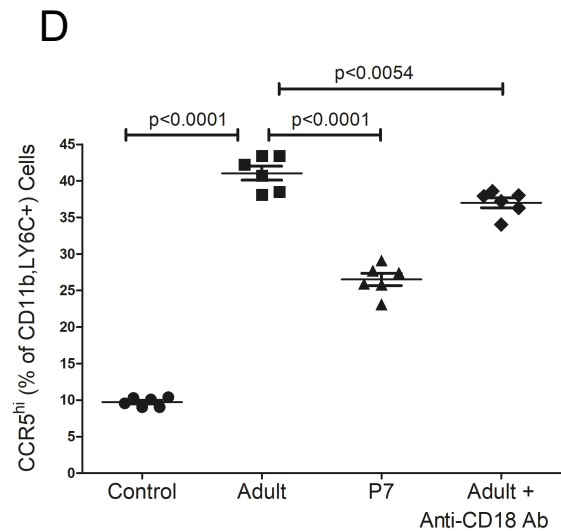

Figure S4: GP1 $\alpha$ -CD18 interactions are not responsible for monocyte trafficking phenotypes. Adult or P7 platelets were co-incubated with monocytes in the presence of IgG or anti-CD18 Ab. 4 hrs later PMAs, Ly6C, CCR2 and CCR5 expression were determined. Anti-CD18 had little effect on A) PMAs, B) Ly6C, or C) CCR2 expression. However, anti-CD18 Ab limited adult platelet induced CCR5 expression. (mean  $\pm$  SEM 1-way ANOVA with Bonferroni correction).

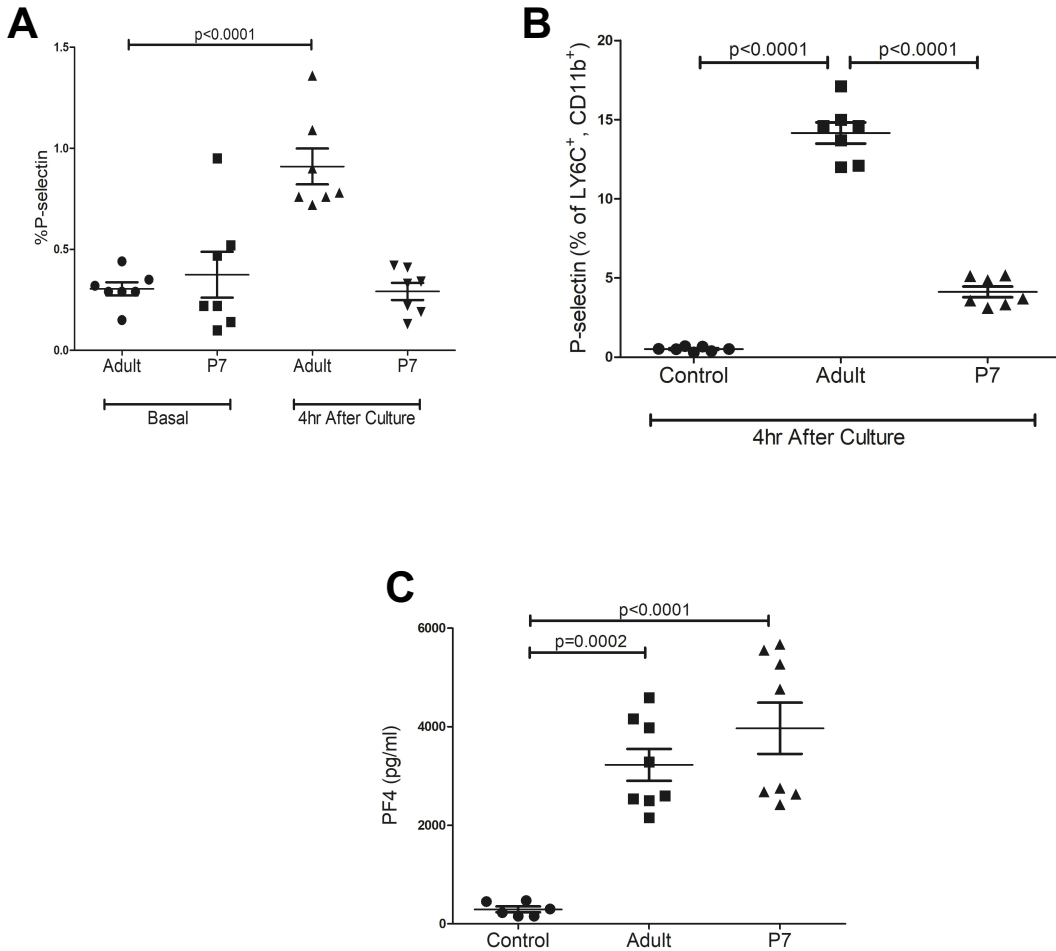

Figure S5: P-selectin expression before and after platelet-monocyte incubation *in vitro*. Primary mouse BMM were co-incubated with adult or P7 platelets and 4 hrs later P-selectin expression on platelets and monocytes was determined. A) Adult platelets had more P-selectin expression after 4 hrs in culture. B) P-selectin expression on monocytes co-incubated with adult platelets after 4hr was increased. C) Supernatant PF4 was the same for both adult and P7 platelets (mean  $\pm$  SEM 1-way ANOVA with Bonferroni correction).

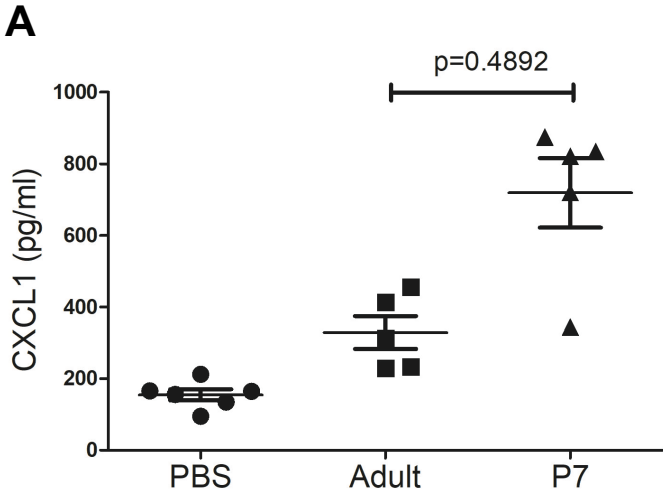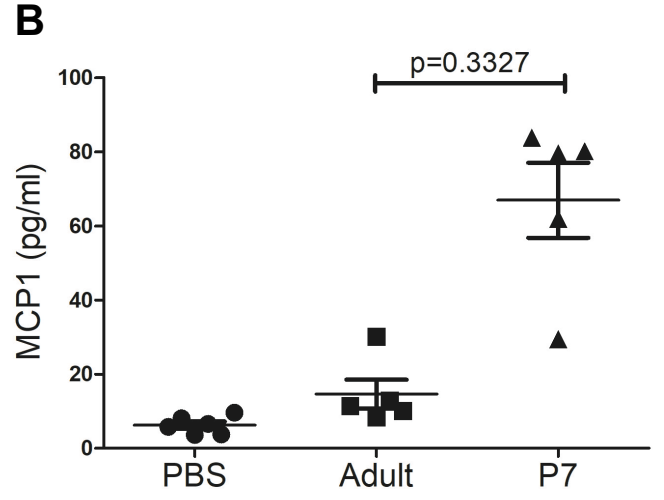

Figure S6: TPOR<sup>-/-</sup> mice were transfused with adult or P7 platelets and 4hr later plasma was collected. ELISAs for CXCL1 and CCL2 were performed. A) Both adult and P7 transfusions increased plasma CXCL1 and B) P7 platelets increased CCL2 more than adult platelets (mean ± SEM , Kruskal Wallis with Dunn’s multiple comparison).

## Major Resources Table

### Animals (in vivo studies)

| Species | Vendor or Source | Background Strain | Sex             | Persistent ID / URL                                                                                 |
|---------|------------------|-------------------|-----------------|-----------------------------------------------------------------------------------------------------|
| Mouse   | Jax Labs         | C57Bl6/J          | Male            | <a href="https://www.jax.org/strain/000664?featured">https://www.jax.org/strain/000664?featured</a> |
| Mouse   | Jax Labs         | C57Bl6/J          | Female          | <a href="https://www.jax.org/strain/000664?featured">https://www.jax.org/strain/000664?featured</a> |
| Mouse   | Envigo           | ICR-Cd1           | Male and female | <a href="https://www.envigo.com/model/hsd-icr-cd-1">https://www.envigo.com/model/hsd-icr-cd-1</a>   |

### Genetically Modified Animals

|                        | Species | Vendor or Source | Background Strain | Other Information | Persistent ID / URL                                                               |
|------------------------|---------|------------------|-------------------|-------------------|-----------------------------------------------------------------------------------|
| <b>Parent - Male</b>   | Mouse   | Jax              | C57Bl6/J          | <i>Mpl KO</i>     | <a href="https://www.jax.org/strain/005124">https://www.jax.org/strain/005124</a> |
| <b>Parent - Female</b> | Mouse   | Jax              | C57Bl6/J          | <i>Mpl KO</i>     | <a href="https://www.jax.org/strain/005124">https://www.jax.org/strain/005124</a> |

### Antibodies

| Target antigen                                 | Vendor or Source      | Catalog #     | Working concentration |
|------------------------------------------------|-----------------------|---------------|-----------------------|
| LY6C                                           | BioLegend             | 128026        | 1 µg/ml               |
| CD11B                                          | BioLegend             | 101212        | 1 µg/ml               |
| CD41                                           | BioLegend             | 133915        | 1 µg/ml               |
| CCR2                                           | BioLegend             | 150610        | 1 µg/ml               |
| CCR5                                           | BioLegend             | 107016        | 1 µg/ml               |
| CD45                                           | BioLegend             | 103108        | 1 µg/ml               |
| LY6G                                           | BioLegend             | 127612        | 1 µg/ml               |
| P-selectin                                     | Fisher Scientific     | BDB553744     | 1 µg/ml               |
| Prostaglandin I2                               | Cayman Chemical       | 18220         | 5nM/ml                |
| Anti-mouse PSGL-1                              | BioXcell              | BE0186        | 20mg/kg               |
| Anti-mouse CD18                                | BioXcell              | BE0009        | 40 µg/ml              |
| IgG                                            | BioXcell              | BP0091        | 10mg/kg               |
| Mouse CCL2/JE/MCP-1 DuoSet ELISA               | R&D system            | DY479-05      | As per instruction    |
| Mouse CXCL1/KC DuoSet ELISA                    | R&D system            | DY453-05      | As per instruction    |
| B2M ELISA Kit (Mouse)                          | Aviva Biosystem       | OKEH00344     | As per instruction    |
| Human beta 2-Microglobulin Parameter Assay Kit | R&D system            | KGE019        | As per instruction    |
| Recombinant Mouse CCL2/JE/MCP-1 Protein        | R&D system            | 479-JE-050/CF | 200 nM/ml             |
| Recombinant Mouse CCL5/RANTES Protein          | R&D system            | 478-MR-025/CF | 200 nM/ml             |
| Mouse Monocytes isolation kit                  | STEMCELL Technologies | 19861         | As per instruction    |
| Crystal Violet                                 | Fisher Scientific     | C581-25       | 1%                    |

### Primer

| Target gene | Vendor or Source | Catalog #     | Species |
|-------------|------------------|---------------|---------|
| <i>Ccl2</i> | Thermo Fisher    | Mm00441242_m1 | Mouse   |
| <i>Ccr2</i> | Thermo Fisher    | Mm99999051_gH | Mouse   |



|       |               |               |       |
|-------|---------------|---------------|-------|
| Ccr5  | Thermo Fisher | Mm01963251_s1 | Mouse |
| Gapdh | Thermo Fisher | Mm99999915_g1 | Mouse |

## ARRIVE GUIDELINES

### Study Design

| Groups              | Sex | Age      | Number (prior to experiment) | Number (after termination) | Littermates (Yes/No) | Other description                 |
|---------------------|-----|----------|------------------------------|----------------------------|----------------------|-----------------------------------|
| Group 1             | M/F | 8-10 wks | Not available                | Not available              | Yes                  | Adult platelet and monocyte donor |
| Group 2             | M/F | P7       | Not available                | Not available              | Yes                  | Neonatal platelet donor           |
| TPOR <sup>-/-</sup> | M/F | P14      | Not available                | Not available              | Yes                  | Transfusion recipient             |

**Sample Size:** Not available

**Inclusion Criteria:** Not applicable

**Exclusion Criteria:** Not applicable

**Randomization:** Not applicable – platelet donors and transfusion recipients must be of the appropriate age and must either be WT donors or TPOR<sup>-/-</sup> transfusion recipients. Whether transfusion recipients received adult or neonatal transfusions was random.

**Blinding:** Not applicable – platelet donors and transfusion recipients must be of the appropriate age and must either be WT donors or TPOR<sup>-/-</sup> transfusion recipients.
